# Supplementary material for: The GIK-Archive of sediment radiography
Source: Copernicus journal article supplement (doi:10.5194/essd-2017-69), 2017-07-19

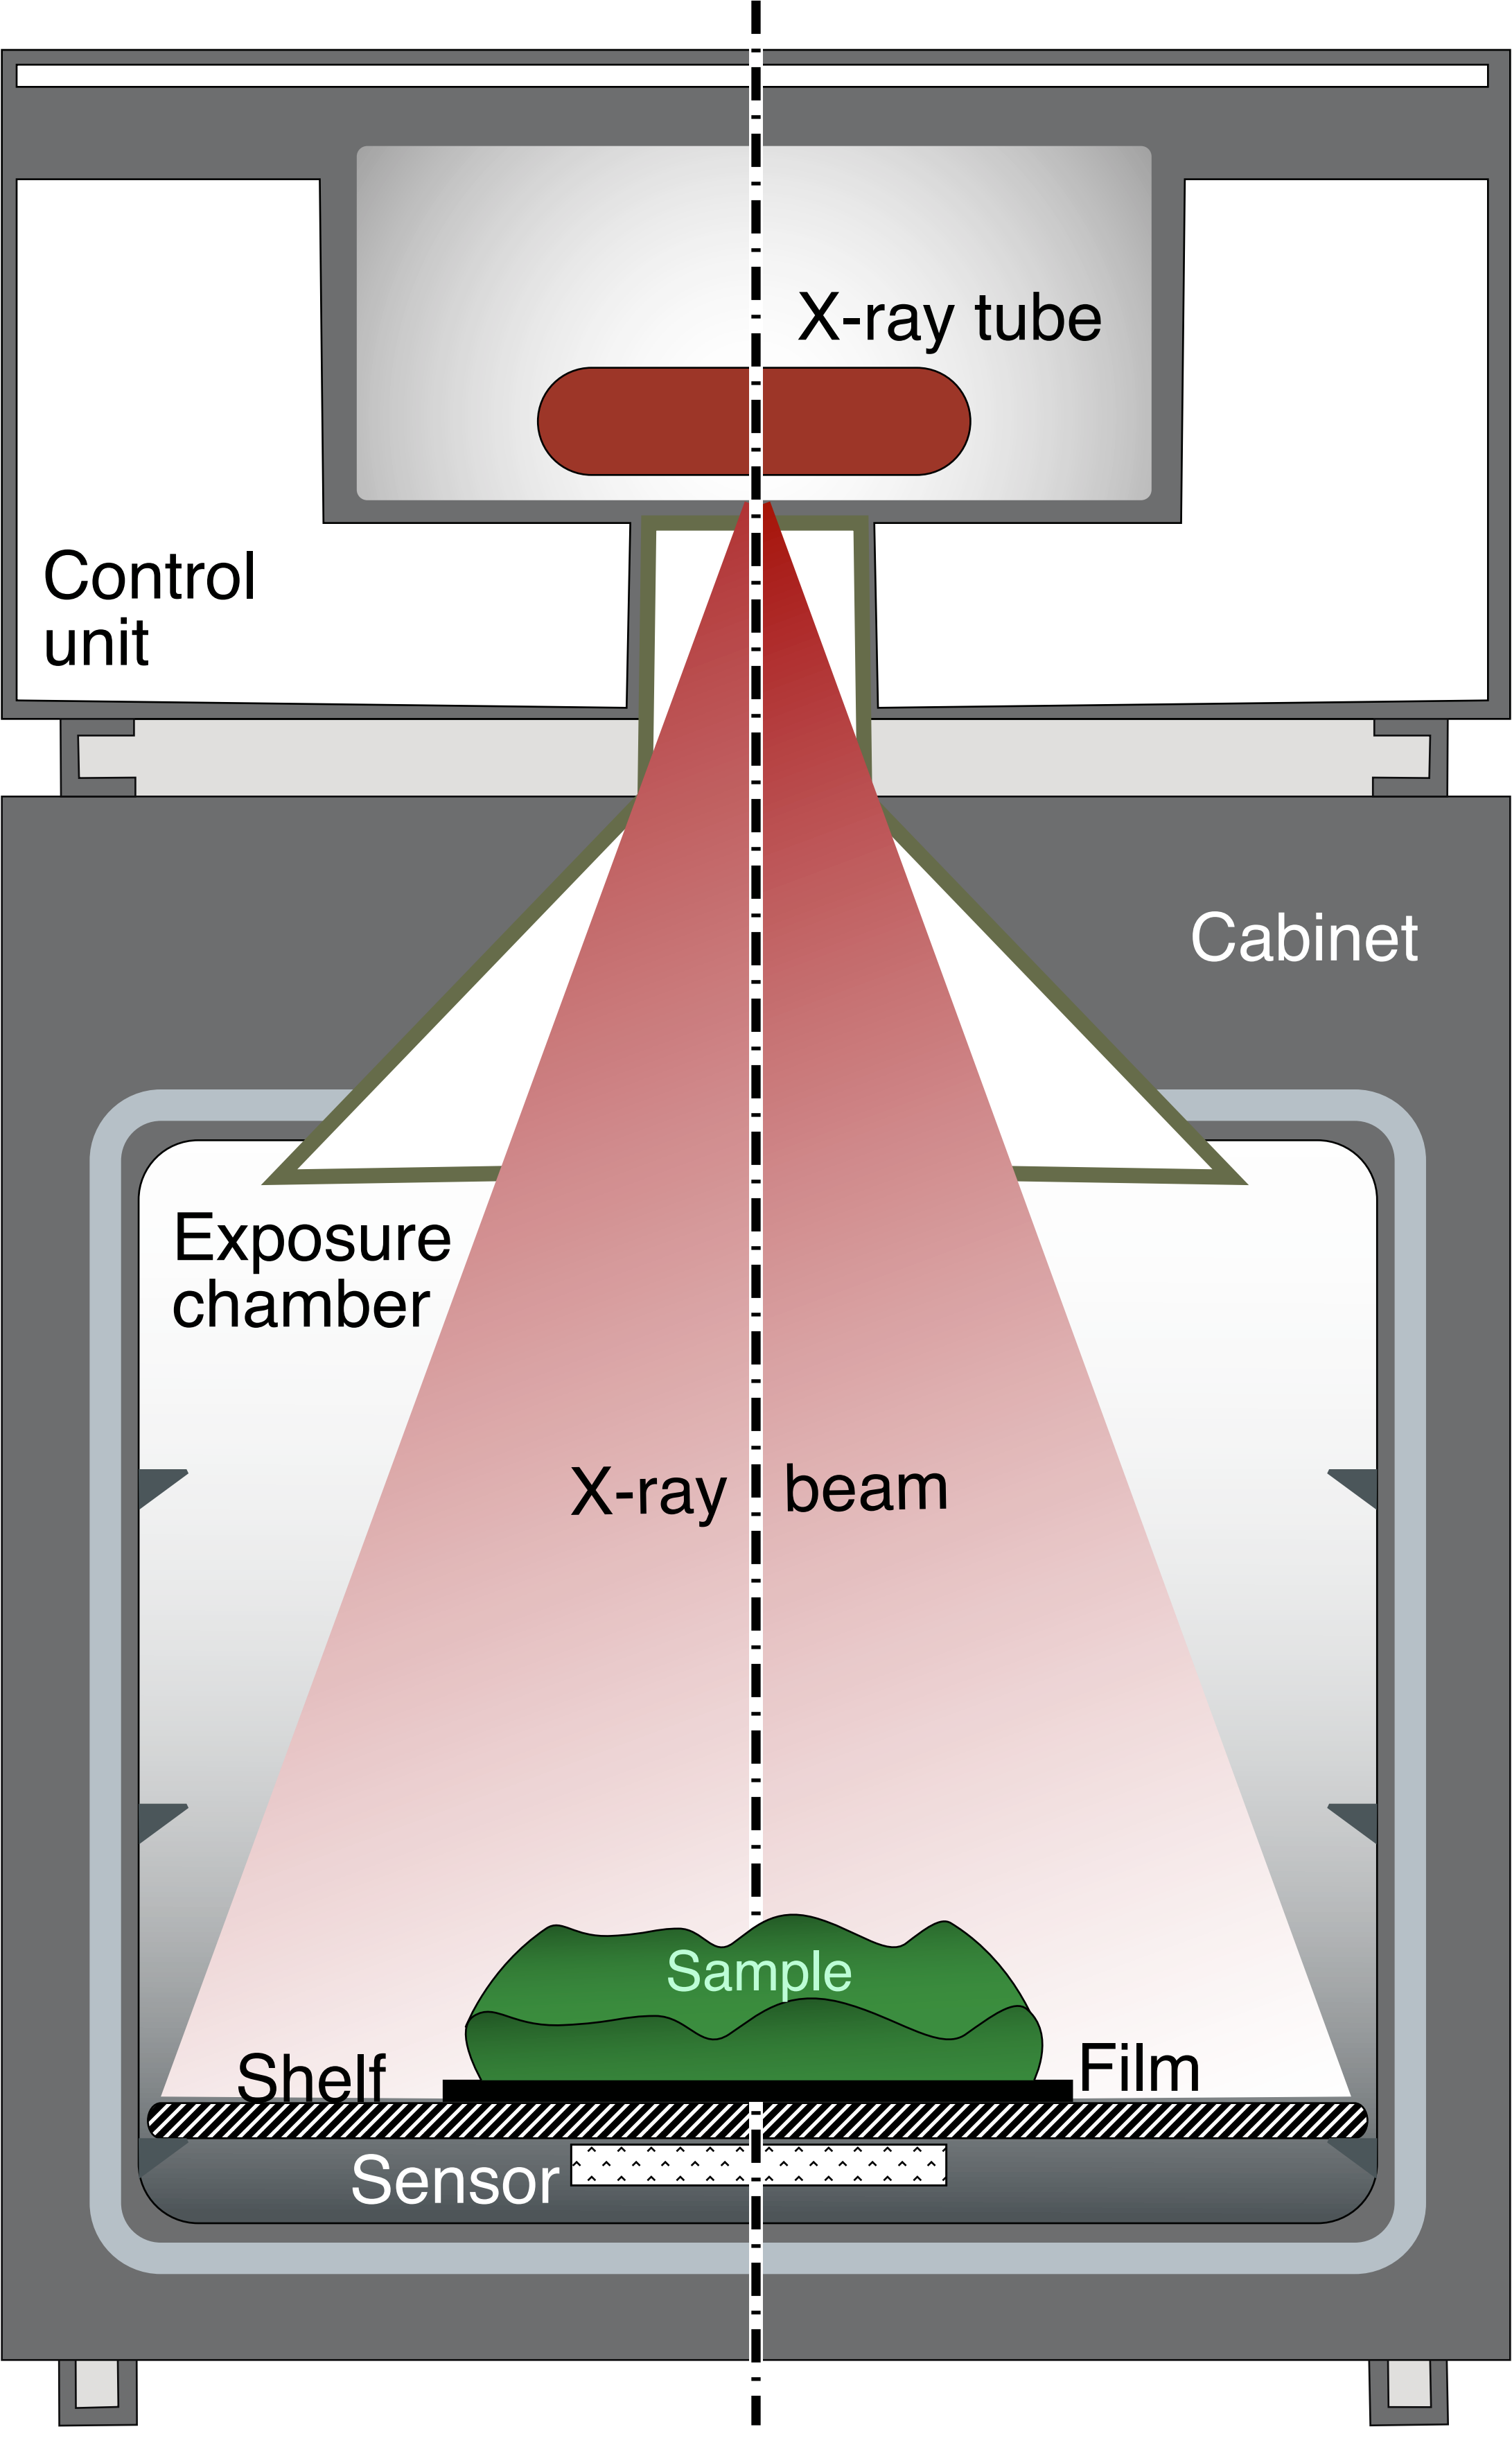

Supplement: Supplementary file [file essd-2017-69-AC1-supplement.zip]
